# Supplementary material for: Comparison of Functional Gene Annotation of Toxascaris leonina and Toxocara canis using CLC Genomics Workbench
Source: PubMed Central journal article supplement — Korean J Parasitol. 2013 Oct 31;51(5):525–30. doi: 10.3347/kjp.2013.51.5.525 (PMC3857499; doi:10.3347/kjp.2013.51.5.525), 2013-10-31
Supplement: kjp-51-525-s001.pdf [file kjp-51-525-s001.pdf]

**Supplementary Table 1.** List of genes in categories in this study

|                                                      |                                                             |                                         |                                                               |
|------------------------------------------------------|-------------------------------------------------------------|-----------------------------------------|---------------------------------------------------------------|
| Molecular antioxidant activity function (GO:0016209) | glutathione dehydrogenase (ascorbate) activity (GO:0045174) |                                         | quaternary ammonium group binding (GO:0050997)                |
|                                                      | glutathione-disulfide reductase activity (GO:0004362)       |                                         | ribonucleoprotein complex binding (GO:0043021)                |
|                                                      | peroxidase activity (GO:0004601)                            |                                         | S-nitrosoglutathione binding (GO:0035730)                     |
|                                                      | sulfiredoxin activity (GO:0032542)                          |                                         | selenium binding (GO:0008430)                                 |
|                                                      | superoxide dismutase activity (GO:0004784)                  |                                         | small molecule binding (GO:0036094)                           |
|                                                      | superoxide reductase activity (GO:0050605)                  |                                         | sulfur compound binding (GO:1901681)                          |
|                                                      | thioredoxin-disulfide reductase activity (GO:0004791)       |                                         | toxic substance binding (GO:0015643)                          |
| binding (GO:0005488)                                 | 2-aminoethylphosphonate binding (GO:0033226)                | catalytic activity (GO:0003824)         | virion binding (GO:0046790)                                   |
|                                                      | acyl binding (GO:0000035)                                   |                                         | water binding (GO:0050824)                                    |
|                                                      | alkene binding (GO:0072328)                                 |                                         | catalysis of free radical formation (GO:0043364)              |
|                                                      | amide binding (GO:0033218)                                  |                                         | cyclase activity (GO:0009975)                                 |
|                                                      | amine binding (GO:0043176)                                  |                                         | deaminase activity (GO:0019239)                               |
|                                                      | antigen binding (GO:0003823)                                |                                         | demethylase activity (GO:0032451)                             |
|                                                      | binding, bridging (GO:0060090)                              |                                         | first spliceosomal transesterification activity (GO:0000384)  |
|                                                      | calcium oxalate binding (GO:0046904)                        |                                         | glycogen debranching enzyme activity (GO:0004133)             |
|                                                      | carbohydrate binding (GO:0030246)                           |                                         | glyoxalase III activity (GO:0019172)                          |
|                                                      | carbohydrate derivative binding (GO:0097367)                |                                         | hydrolase activity (GO:0016787)                               |
|                                                      | chromatin binding (GO:0003682)                              |                                         | integrase activity (GO:0008907)                               |
|                                                      | cofactor binding (GO:0048037)                               |                                         | isomerase activity (GO:0016853)                               |
|                                                      | dinitrosyl-iron complex binding (GO:0035731)                |                                         | ligase activity (GO:0016874)                                  |
|                                                      | drug binding (GO:0008144)                                   |                                         | lyase activity (GO:0016829)                                   |
|                                                      | extracellular matrix binding (GO:0050840)                   |                                         | Mo-molybdopterin cofactor sulfurase activity (GO:0008265)     |
|                                                      | fatty acid derivative binding (GO:1901567)                  |                                         | Mo-molybdopterin synthase activity (GO:0030366)               |
|                                                      | flavonoid binding (GO:0097243)                              |                                         | N-ethylmeline chlorohydrolase activity (GO:0016217)           |
|                                                      | flurbiprofen binding (GO:0035923)                           |                                         | oxidoreductase activity (GO:0016491)                          |
|                                                      | heterocyclic compound binding (GO:1901363)                  |                                         | phenylacetaldehyde synthase activity (GO:1990055)             |
|                                                      | hormone binding (GO:0042562)                                |                                         | phytoene synthase activity (GO:0046905)                       |
|                                                      | host cell surface binding (GO:0046812)                      |                                         | quinolate synthetase A activity (GO:0008987)                  |
|                                                      | hydroxyapatite binding (GO:0046848)                         |                                         | radical SAM enzyme activity (GO:0070283)                      |
|                                                      | ion binding (GO:0043167)                                    |                                         | recombinase activity (GO:0000150)                             |
|                                                      | kinetochore binding (GO:0043515)                            |                                         | second spliceosomal transesterification activity (GO:0000386) |
|                                                      | lipid binding (GO:0008289)                                  |                                         | site-specific recombinase activity (GO:0009009)               |
|                                                      | lipoteichoic acid binding (GO:0070891)                      |                                         | site-specific telomere resolvase activity (GO:0043336)        |
|                                                      | metal cluster binding (GO:0051540)                          |                                         | small protein activating enzyme activity (GO:0008641)         |
|                                                      | microfibril binding (GO:0050436)                            |                                         | transferase activity (GO:0016740)                             |
|                                                      | neurotransmitter binding (GO:0042165)                       |                                         | transposase activity (GO:0004803)                             |
|                                                      | nitric oxide binding (GO:0070026)                           |                                         | UDP-L-rhamnose synthase activity (GO:0010280)                 |
|                                                      | odorant binding (GO:0005549)                                |                                         | versicolorin B synthase activity (GO:0046572)                 |
|                                                      | organic cyclic compound binding (GO:0097159)                |                                         |                                                               |
|                                                      | oxygen binding (GO:0019825)                                 | channel regulator activity (GO:0016247) | calcium channel regulator activity (GO:0005246)               |
|                                                      | pattern binding (GO:0001871)                                |                                         | channel inhibitor activity (GO:0016248)                       |
|                                                      | pigment binding (GO:0031409)                                |                                         |                                                               |
|                                                      | poly(3-hydroxyalkanoate) binding (GO:0043287)               |                                         |                                                               |
|                                                      | polyamine binding (GO:0019808)                              |                                         |                                                               |
|                                                      | protein binding (GO:0005515)                                |                                         |                                                               |
|                                                      | protein-lipid complex binding (GO:0071814)                  |                                         |                                                               |

**Supplementary Table 1. Continued**

|                                        |                                                                                                                                               |                                                                 |                                                                             |
|----------------------------------------|-----------------------------------------------------------------------------------------------------------------------------------------------|-----------------------------------------------------------------|-----------------------------------------------------------------------------|
|                                        | chloride channel regulator activity (GO:0017081)                                                                                              |                                                                 | ligase regulator activity (GO:0055103)                                      |
|                                        | potassium channel regulator activity (GO:0015459)                                                                                             |                                                                 | metalloenzyme regulator activity (GO:0010576)                               |
|                                        | sodium channel regulator activity (GO:0017080)                                                                                                |                                                                 | methionine adenosyltransferase regulator activity (GO:0048270)              |
| chemoattractant activity (GO:0042056)  | chemoattractant activity                                                                                                                      |                                                                 | nitric-oxide synthase regulator activity (GO:0030235)                       |
| chemorepellent activity (GO:0045499)   | chemorepellent activity                                                                                                                       |                                                                 | nucleoside-triphosphatase regulator activity (GO:0060589)                   |
| D-alanyl carrier activity (GO:0036370) | D-alanyl carrier activity                                                                                                                     |                                                                 | ornithine decarboxylase regulator activity (GO:0042979)                     |
| electron carrier activity (GO:0009055) | electron transporter, transferring electrons from CoQH2-cytochrome c reductase complex and cytochrome c oxidase complex activity (GO:0045155) |                                                                 | peptidase regulator activity (GO:0061134)                                   |
|                                        | electron transporter, transferring electrons from cytochrome b6/f complex of photosystem II activity (GO:0046028)                             | metallochaperone activity (GO:0016530)                          | phosphatase regulator activity (GO:0019208)                                 |
|                                        | electron transporter, transferring electrons within CoQH2-cytochrome c reductase complex activity (GO:0045153)                                | molecular transducer activity (GO:0060089)                      | UTP:glucose-1-phosphate uridylyltransferase regulator activity (GO:0043763) |
|                                        | electron transporter, transferring electrons within cytochrome b6/f complex of photosystem II activity (GO:0045158)                           | morphogen activity (GO:0016015)                                 | copper chaperone activity (GO:0016531)                                      |
|                                        | electron transporter, transferring electrons within cytochrome c oxidase complex activity (GO:0045154)                                        | nucleic acid binding transcription factor activity (GO:0001071) | iron chaperone activity (GO:0034986)                                        |
|                                        | electron transporter, transferring electrons within the cyclic electron transport pathway of photosynthesis activity (GO:0045156)             | nutrient reservoir activity (GO:0045735)                        | energy transducer activity (GO:0031992)                                     |
|                                        | electron transporter, transferring electrons within the noncyclic electron transport pathway of photosynthesis activity (GO:0045157)          | protein binding transcription factor activity (GO:0000988)      | signal transducer activity (GO:0004871)                                     |
| enzyme regulator activity (GO:0030234) | cyclase regulator activity (GO:0010851)                                                                                                       | protein tag (GO:0031386)                                        | morphogen activity                                                          |
|                                        | cyclin-dependent protein kinase 5 activator regulator activity (GO:0016536)                                                                   | receptor activity (GO:0004872)                                  | RNA binding transcription factor activity (GO:0001070)                      |
|                                        | cysteine-type endopeptidase regulator activity involved in apoptotic process (GO:0043028)                                                     |                                                                 | sequence-specific DNA binding transcription factor activity (GO:0003700)    |
|                                        | DNA polymerase processivity factor activity (GO:0030337)                                                                                      |                                                                 | nutrient reservoir activity                                                 |
|                                        | enzyme activator activity (GO:0008047)                                                                                                        |                                                                 |                                                                             |
|                                        | enzyme inhibitor activity (GO:0004857)                                                                                                        |                                                                 | core RNA polymerase binding transcription factor activity (GO:0000990)      |
|                                        | GTP cyclohydrolase I regulator activity (GO:0060308)                                                                                          |                                                                 | transcription factor binding transcription factor activity (GO:0000989)     |
|                                        | guiding stereospecific synthesis activity (GO:0042349)                                                                                        |                                                                 | protein tag                                                                 |
|                                        | histone acetyltransferase regulator activity (GO:0035034)                                                                                     |                                                                 | apolipoprotein receptor activity (GO:0030226)                               |
|                                        | histone deacetylase regulator activity (GO:0035033)                                                                                           |                                                                 | cargo receptor activity (GO:0038024)                                        |
|                                        | inositol phosphoceramide synthase regulator activity (GO:0070917)                                                                             |                                                                 | decoy death receptor activity (GO:0005040)                                  |
|                                        | kinase regulator activity (GO:0019207)                                                                                                        |                                                                 | laminin receptor activity (GO:0005055)                                      |
|                                        |                                                                                                                                               |                                                                 | pattern recognition receptor activity (GO:0038187)                          |
|                                        |                                                                                                                                               |                                                                 | signaling receptor activity (GO:0038023)                                    |
|                                        |                                                                                                                                               |                                                                 | virus receptor activity (GO:0001618)                                        |
|                                        |                                                                                                                                               |                                                                 | acetylcholine receptor regulator activity (GO:0030548)                      |
|                                        |                                                                                                                                               |                                                                 | receptor activator activity (GO:0030546)                                    |
|                                        |                                                                                                                                               |                                                                 | receptor inhibitor activity (GO:0030547)                                    |
|                                        |                                                                                                                                               |                                                                 | extracellular matrix structural constituent (GO:0005201)                    |
|                                        |                                                                                                                                               |                                                                 | protein complex scaffold (GO:0032947)                                       |
|                                        |                                                                                                                                               |                                                                 | structural constituent of albumen (GO:0097099)                              |
|                                        |                                                                                                                                               |                                                                 | structural constituent of bone (GO:0008147)                                 |

Supplementary Table 1. Continued

|                                             |                                                                    |                                                          |  |
|---------------------------------------------|--------------------------------------------------------------------|----------------------------------------------------------|--|
|                                             | structural constituent of carboxysome (GO:0043886)                 |                                                          |  |
|                                             | structural constituent of cell wall (GO:0005199)                   |                                                          |  |
|                                             | structural constituent of chorion (GO:0005213)                     |                                                          |  |
|                                             | structural constituent of chromatin (GO:0030527)                   |                                                          |  |
|                                             | structural constituent of cuticle (GO:0042302)                     |                                                          |  |
|                                             | structural constituent of cytoskeleton (GO:0005200)                |                                                          |  |
|                                             | structural constituent of egg coat (GO:0035804)                    |                                                          |  |
|                                             | structural constituent of epidermis (GO:0030280)                   |                                                          |  |
|                                             | structural constituent of eye lens (GO:0005212)                    |                                                          |  |
|                                             | structural constituent of muscle (GO:0008307)                      |                                                          |  |
|                                             | structural constituent of myelin sheath (GO:0019911)               |                                                          |  |
|                                             | structural constituent of nuclear pore (GO:0017056)                |                                                          |  |
|                                             | structural constituent of peritrophic membrane (GO:0016490)        |                                                          |  |
|                                             | structural constituent of ribosome (GO:0003735)                    |                                                          |  |
| translation regulator activity (GO:0045182) | translation factor activity, non-nucleic acid binding (GO:0045183) |                                                          |  |
|                                             | translation regulator activity, nucleic acid binding (GO:0090079)  |                                                          |  |
|                                             | translation repressor activity (GO:0030371)                        |                                                          |  |
| transporter activity (GO:0005215)           | alkane transporter activity (GO:0015567)                           |                                                          |  |
|                                             | carbohydrate derivative transporter activity (GO:1901505)          |                                                          |  |
|                                             | carbohydrate transporter activity (GO:1901476)                     |                                                          |  |
|                                             | cofactor transporter activity (GO:0051184)                         |                                                          |  |
|                                             | drug transporter activity (GO:0090484)                             |                                                          |  |
|                                             | fatty-acyl-CoA transporter activity (GO:0015607)                   |                                                          |  |
|                                             | neurotransmitter transporter activity (GO:0005326)                 |                                                          |  |
|                                             | nucleocytoplasmic transporter activity (GO:0005487)                |                                                          |  |
|                                             | odorant transporter activity (GO:0043563)                          |                                                          |  |
|                                             | siderophore transporter activity (GO:0042927)                      |                                                          |  |
|                                             | substrate-specific transporter activity (GO:0022892)               |                                                          |  |
|                                             | toxin transporter activity (GO:0019534)                            |                                                          |  |
|                                             | transmembrane transporter activity (GO:0022857)                    |                                                          |  |
|                                             | vitamin transporter activity (GO:0051183)                          |                                                          |  |
|                                             | xenobiotic transporter activity (GO:0042910)                       |                                                          |  |
| Cellular component                          | cell (GO:0005623)                                                  | cell part (GO:0044464)                                   |  |
|                                             | cell junction (GO:0030054)                                         | Dxr protein complex (GO:1990065)                         |  |
|                                             |                                                                    | anchoring junction (GO:0070161)                          |  |
|                                             |                                                                    | cell-cell junction (GO:0005911)                          |  |
|                                             |                                                                    | cell-substrate junction (GO:0030055)                     |  |
|                                             |                                                                    | plasma membrane part of cell junction (GO:0061466)       |  |
|                                             | cell part (GO:0044464)                                             | 3-phenylpropionate dioxygenase complex (GO:0009334)      |  |
|                                             |                                                                    | annulate lamellae (GO:0005642)                           |  |
|                                             |                                                                    | apical complex (GO:0020007)                              |  |
|                                             |                                                                    | apical part of cell (GO:0045177)                         |  |
|                                             |                                                                    | ascus epiplasm (GO:0072324)                              |  |
|                                             |                                                                    | aspartate carbamoyltransferase complex (GO:0009347)      |  |
|                                             |                                                                    | basal labyrinth (GO:0033774)                             |  |
|                                             |                                                                    | basal part of cell (GO:0045178)                          |  |
|                                             |                                                                    | basal ring of apical complex (GO:0020032)                |  |
|                                             |                                                                    | CD20-Lck-Fyn complex (GO:0070331)                        |  |
|                                             |                                                                    | CD20-Lck-Lyn-Fyn complex (GO:0070332)                    |  |
|                                             |                                                                    | cell body (GO:0044297)                                   |  |
|                                             |                                                                    | cell division site (GO:0032153)                          |  |
|                                             |                                                                    | cell division site part (GO:0032155)                     |  |
|                                             |                                                                    | cell envelope Sec protein transport complex (GO:0031522) |  |
|                                             |                                                                    | cell leading edge (GO:0031252)                           |  |
|                                             |                                                                    | cell periphery (GO:0071944)                              |  |
|                                             |                                                                    | cell pole (GO:0060187)                                   |  |
|                                             |                                                                    | cell projection (GO:0042995)                             |  |
|                                             |                                                                    | cell projection part (GO:0044463)                        |  |
|                                             |                                                                    | cell septum (GO:0030428)                                 |  |
|                                             |                                                                    | cell septum part (GO:0044457)                            |  |
|                                             |                                                                    | cell surface (GO:0009986)                                |  |
|                                             |                                                                    | cellular bud (GO:0005933)                                |  |
|                                             |                                                                    | coated pit (GO:0005905)                                  |  |
|                                             |                                                                    | compact myelin (GO:0043218)                              |  |
|                                             |                                                                    | contractile ring (GO:0070938)                            |  |
|                                             |                                                                    | cyclic-nucleotide phosphodiesterase complex (GO:0005966) |  |
|                                             |                                                                    | cytoophidium (GO:0097268)                                |  |
|                                             |                                                                    | dimethyl sulfoxide reductase complex (GO:0009390)        |  |
|                                             |                                                                    | Dxr protein complex (GO:1990065)                         |  |
|                                             |                                                                    | eisosome (GO:0032126)                                    |  |
|                                             |                                                                    | endomembrane system (GO:0012505)                         |  |
|                                             |                                                                    | ensheathing process (GO:1990015)                         |  |
|                                             |                                                                    | envelope (GO:0031975)                                    |  |
|                                             |                                                                    | external encapsulating structure (GO:0030312)            |  |
|                                             |                                                                    | external encapsulating structure part (GO:0044462)       |  |
|                                             |                                                                    | Flemming body (GO:0090543)                               |  |
|                                             |                                                                    | formate dehydrogenase complex (GO:0009326)               |  |
|                                             |                                                                    | germ tube (GO:0032179)                                   |  |
|                                             |                                                                    | HICS complex (GO:0044697)                                |  |

Supplementary Table 1. Continued

|                                                                            |                                                                             |
|----------------------------------------------------------------------------|-----------------------------------------------------------------------------|
| inner membrane complex (GO:0070258)                                        | site of polarized growth (GO:0030427)                                       |
| intracellular (GO:0005622)                                                 | sperm individualization complex (GO:0070864)                                |
| intracellular immature spore (GO:0042763)                                  | sperm part (GO:0097223)                                                     |
| intracellular part (GO:0044424)                                            | spitzenkorper (GO:0031521)                                                  |
| Kibra-Ex-Mer complex (GO:0036375)                                          | stereocilia ankle link complex (GO:0002142)                                 |
| lateral loop (GO:0043219)                                                  | stereocilia coupling link (GO:0002139)                                      |
| lateral part of motile cell (GO:0031255)                                   | tail portion of tanyocyte (GO:1990018)                                      |
| longitudinal side of cell surface (GO:0009930)                             | trailing edge (GO:0031254)                                                  |
| methane monooxygenase complex (GO:0015050)                                 | trimethylamine-N-oxide reductase complex (GO:0009322)                       |
| midbody (GO:0030496)                                                       | tripartite ATP-independent periplasmic transporter complex (GO:0031317)     |
| molybdopterin synthase complex (GO:0019008)                                | type I protein secretion system complex (GO:0030256)                        |
| myelin sheath (GO:0043209)                                                 | type II protein secretion system complex (GO:0015627)                       |
| myelin sheath abaxonal region (GO:0035748)                                 | type III protein secretion system complex (GO:0030257)                      |
| myelin sheath adaxonal region (GO:0035749)                                 | type IV secretion system complex (GO:0043684)                               |
| neck portion of tanyocyte (GO:1990016)                                     | type V protein secretion system complex (GO:0098046)                        |
| neuron part (GO:0097458)                                                   | type VI protein secretion system complex (GO:0033104)                       |
| NHE3/E3KARP/ACTN4 complex (GO:0032766)                                     | vesicle membrane (GO:0012506)                                               |
| nitrate reductase complex (GO:0009325)                                     | extracellular matrix (GO:0031012)                                           |
| nitrite reductase complex [NAD(P)H] (GO:0009344)                           | biofilm matrix (GO:0097311)                                                 |
| nuclear outer membrane-endoplasmic reticulum membrane network (GO:0042175) | extracellular matrix part (GO:0044420)                                      |
| pellicle (GO:0020039)                                                      | plant extracellular matrix (GO:0048196)                                     |
| periplasmic space (GO:0042597)                                             | proteinaceous extracellular matrix (GO:0005578)                             |
| plant extracellular matrix (GO:0048196)                                    | extracellular matrix part (GO:0044420)                                      |
| plasma membrane (GO:0005886)                                               | apical lamina of hyaline layer (GO:0032579)                                 |
| plasma membrane part (GO:0044459)                                          | basal lamina (GO:0005605)                                                   |
| polar ring of apical complex (GO:0020031)                                  | basement membrane (GO:0005604)                                              |
| polar tube (GO:0044099)                                                    | biofilm matrix part (GO:0097312)                                            |
| polyphosphate kinase complex (GO:0009358)                                  | collagen (GO:0005581)                                                       |
| prospore membrane (GO:0005628)                                             | collagen and cuticulin-based cuticle extracellular matrix part (GO:0060103) |
| prospore membrane leading edge (GO:0070056)                                | columella (GO:0043674)                                                      |
| prospore membrane spindle pole body attachment site (GO:0070057)           | ectexine (GO:0043669)                                                       |
| protein serine/threonine phosphatase complex (GO:0008287)                  | elastic fiber (GO:0071953)                                                  |
| retromer complex (GO:0030904)                                              | endexine (GO:0043671)                                                       |
| retromer complex, inner shell (GO:0030906)                                 | exine (GO:0043668)                                                          |
| retromer complex, outer shell (GO:0030905)                                 | fibril (GO:0043205)                                                         |
| rhoptry (GO:0020008)                                                       | foot layer (GO:0043670)                                                     |
| rhoptry lumen (GO:0034591)                                                 | germination pore (GO:0043677)                                               |
| rhoptry membrane (GO:0033016)                                              | intine (GO:0043678)                                                         |
| riboflavin synthase complex (GO:0009349)                                   | lamina densa (GO:0008003)                                                   |
| Schmidt-Lanterman incisure (GO:0043220)                                    | lamina lucida (GO:0008002)                                                  |
|                                                                            | lamina reticularis (GO:0008004)                                             |
|                                                                            | laminin complex (GO:0043256)                                                |
|                                                                            | middle lamella (GO:0009519)                                                 |
|                                                                            | nexine (GO:0043672)                                                         |
|                                                                            | perineuronal net (GO:0072534)                                               |
|                                                                            | pollen coat (GO:0070505)                                                    |
|                                                                            | pollen wall (GO:0043667)                                                    |

Supplementary Table 1. Continued

|                                        |                                                                             |                                     |                                                                            |
|----------------------------------------|-----------------------------------------------------------------------------|-------------------------------------|----------------------------------------------------------------------------|
|                                        | sculpture element (GO:0043675)                                              |                                     | lamina reticularis (GO:0008004)                                            |
|                                        | sexine (GO:0043673)                                                         |                                     | laminin complex (GO:0043256)                                               |
|                                        | synaptic cleft (GO:0043083)                                                 |                                     | larval serum protein complex (GO:0005616)                                  |
|                                        | tectum (GO:0043676)                                                         |                                     | mucus layer (GO:0070701)                                                   |
|                                        | Ubisch body (GO:0070645)                                                    |                                     | other organism part (GO:0044217)                                           |
| extracellular region (GO:0005576)      | apoplast (GO:0048046)                                                       |                                     | plasma lipoprotein particle (GO:0034358)                                   |
| extracellular region part (GO:0044421) | extracellular region part (GO:0044421)                                      |                                     | proteinaceous extracellular matrix (GO:0005578)                            |
|                                        | activin complex (GO:0048180)                                                | macromolecular complex (GO:0032991) | dosage compensation complex (GO:0046536)                                   |
|                                        | angiogenin-PR1 complex (GO:0032311)                                         |                                     | protein complex (GO:0043234)                                               |
|                                        | apical lamina of hyaline layer (GO:0032579)                                 |                                     | protein-carbohydrate complex (GO:0032992)                                  |
|                                        | apoptotic body (GO:0097189)                                                 |                                     | protein-DNA complex (GO:0032993)                                           |
|                                        | basal lamina (GO:0005605)                                                   |                                     | protein-DNA-RNA complex (GO:0001114)                                       |
|                                        | basement membrane (GO:0005604)                                              |                                     | protein-lipid complex (GO:0032994)                                         |
|                                        | blood microparticle (GO:0072562)                                            |                                     | ribonucleoprotein complex (GO:0030529)                                     |
|                                        | bursicon neuropeptide hormone complex (GO:0031395)                          |                                     | sperm individualization complex (GO:0070864)                               |
|                                        | classical-complement-pathway C3/C5 convertase complex (GO:0005601)          |                                     | subapical complex (GO:0035003)                                             |
|                                        | CNTFR-CLCF1 complex (GO:0097059)                                            | membrane (GO:0016020)               | ascus membrane (GO:0036362)                                                |
|                                        | collagen (GO:0005581)                                                       |                                     | coated membrane (GO:0048475)                                               |
|                                        | collagen and cuticulin-based cuticle extracellular matrix part (GO:0060103) |                                     | membrane part (GO:0044425)                                                 |
|                                        | complement component C1 complex (GO:0005602)                                |                                     | nuclear outer membrane-endoplasmic reticulum membrane network (GO:0042175) |
|                                        | CRLF-CLCF1 complex (GO:0097058)                                             |                                     | organelle membrane (GO:0031090)                                            |
|                                        | extra-invasive hyphal space (GO:0085040)                                    |                                     | outer membrane (GO:0019867)                                                |
|                                        | extracellular ferritin complex (GO:0070289)                                 |                                     | photoreceptor inner segment membrane (GO:0060342)                          |
|                                        | extracellular isoamylase complex (GO:0010367)                               |                                     | photosynthetic membrane (GO:0034357)                                       |
|                                        | extracellular organelle (GO:0043230)                                        |                                     | plasma membrane (GO:0005886)                                               |
|                                        | extracellular space (GO:0005615)                                            |                                     | pre-autophagosomal structure membrane (GO:0034045)                         |
|                                        | extracellular space of host (GO:0043655)                                    |                                     | prospore membrane (GO:0005628)                                             |
|                                        | extrahaustorial matrix (GO:0085036)                                         |                                     | synaptic membrane (GO:0097060)                                             |
|                                        | extraorganismal space (GO:0043245)                                          |                                     | virion membrane (GO:0055036)                                               |
|                                        | female germline ring canal inner rim (GO:0035183)                           | membrane part (GO:0044425)          | annulate lamellae (GO:0005642)                                             |
|                                        | female germline ring canal outer rim (GO:0035182)                           |                                     | AP-type membrane coat adaptor complex (GO:0030119)                         |
|                                        | fibril (GO:0043205)                                                         |                                     | ATP-binding cassette (ABC) transporter complex (GO:0043190)                |
|                                        | fibrinogen complex (GO:0005577)                                             |                                     | Bam protein complex (GO:1990063)                                           |
|                                        | follicle-stimulating hormone complex (GO:0016914)                           |                                     | cation-transporting ATPase complex (GO:0090533)                            |
|                                        | hyaluronan cable (GO:0036117)                                               |                                     | Cdc48p-Npl4p-Ufd1p AAA ATPase complex (GO:0034098)                         |
|                                        | immunoglobulin complex, circulating (GO:0042571)                            |                                     | chloroplast ATP synthase complex (GO:0009544)                              |
|                                        | inhibin complex (GO:0043511)                                                |                                     | chloroplast outer membrane translocon (GO:0010278)                         |
|                                        | insulin-like growth factor binding protein complex (GO:0016942)             |                                     | chromosome segregation-directing complex (GO:0043913)                      |
|                                        | intercellular bridge (GO:0045171)                                           |                                     | clathrin complex (GO:0071439)                                              |
|                                        | interleukin-12 complex (GO:0043514)                                         |                                     | coated pit (GO:0005905)                                                    |
|                                        | interleukin-23 complex (GO:0070743)                                         |                                     |                                                                            |
|                                        | interleukin-27 complex (GO:0070744)                                         |                                     |                                                                            |
|                                        | interleukin-35 complex (GO:0070745)                                         |                                     |                                                                            |
|                                        | lamina densa (GO:0008003)                                                   |                                     |                                                                            |
|                                        | lamina lucida (GO:0008002)                                                  |                                     |                                                                            |

**Supplementary Table 1. Continued**

|                                                                             |                                                                                        |
|-----------------------------------------------------------------------------|----------------------------------------------------------------------------------------|
| cytochrome o ubiquinol oxidase complex (GO:0009319)                         | nuclear membrane part (GO:0044453)                                                     |
| dolichyl-phosphate-mannose-protein mannosyltransferase complex (GO:0031502) | nuclear outer membrane (GO:0005640)                                                    |
| Dsc E3 ubiquitin ligase complex (GO:0044695)                                | nuclear outer membrane-endoplasmic reticulum membrane network (GO:0042175)             |
| EGO complex (GO:0034448)                                                    | nuclear pore central transport channel (GO:0044613)                                    |
| endoplasmic reticulum membrane (GO:0005789)                                 | nuclear pore cytoplasmic filaments (GO:0044614)                                        |
| endoplasmic reticulum palmitoyltransferase complex (GO:0031211)             | nuclear pore inner ring (GO:0044611)                                                   |
| endoplasmic reticulum Sec complex (GO:0031205)                              | nuclear pore linkers (GO:0044612)                                                      |
| endosomal scaffold complex (GO:0032969)                                     | nuclear pore nuclear basket (GO:0044615)                                               |
| ER membrane protein complex (GO:0072546)                                    | nuclear pore outer ring (GO:0031080)                                                   |
| ER ubiquitin ligase complex (GO:0000835)                                    | nuclear pore transmembrane ring (GO:0070762)                                           |
| ESCRT I complex (GO:0000813)                                                | oligosaccharyltransferase complex (GO:0008250)                                         |
| ESCRT II complex (GO:0000814)                                               | organelle membrane contact site (GO:0044232)                                           |
| ESCRT III complex (GO:0000815)                                              | outer acrosomal membrane (GO:0002081)                                                  |
| external side of cell outer membrane (GO:0031240)                           | oxygen evolving complex (GO:0009654)                                                   |
| external side of endosome membrane (GO:0010009)                             | PAS complex (GO:0070772)                                                               |
| extrinsic to membrane (GO:0019898)                                          | photosystem (GO:0009521)                                                               |
| fatty acid elongase complex (GO:0009923)                                    | photosystem I antenna complex (GO:0009782)                                             |
| fully spanning plasma membrane (GO:0044214)                                 | photosystem I reaction center (GO:0009538)                                             |
| fumarate reductase complex (GO:0045283)                                     | photosystem II antenna complex (GO:0009783)                                            |
| GPI-anchor transamidase complex (GO:0042765)                                | photosystem II reaction center (GO:0009539)                                            |
| HOPS complex (GO:0030897)                                                   | phycobilisome (GO:0030089)                                                             |
| inner acrosomal membrane (GO:0002079)                                       | plasma membrane part (GO:0044459)                                                      |
| internal side of cell outer membrane (GO:0031241)                           | pore complex (GO:0046930)                                                              |
| intrinsic to membrane (GO:0031224)                                          | pre-B cell receptor complex (GO:0035369)                                               |
| ion channel complex (GO:0034702)                                            | prospore membrane leading edge (GO:0070056)                                            |
| leaflet of membrane bilayer (GO:0097478)                                    | prospore membrane spindle pole body attachment site (GO:0070057)                       |
| lipopolysaccharide receptor complex (GO:0046696)                            | protein C inhibitor-acrosin complex (GO:0033282)                                       |
| membrane coat (GO:0030117)                                                  | proton-transporting ATP synthase, catalytic core (GO:0045267)                          |
| membrane raft (GO:0045121)                                                  | proton-transporting ATP synthase, central stalk (GO:0045269)                           |
| mepripin A complex (GO:0017090)                                             | proton-transporting ATP synthase, stator stalk (GO:0045265)                            |
| MHC class I peptide loading complex (GO:0042824)                            | proton-transporting two-sector ATPase complex (GO:0016469)                             |
| mitochondrial membrane part (GO:0044455)                                    | proton-transporting two-sector ATPase complex, catalytic domain (GO:0033178)           |
| NAD(P)H dehydrogenase complex (plastoquinone) (GO:0010598)                  | proton-transporting two-sector ATPase complex, proton-transporting domain (GO:0033177) |
| NADH dehydrogenase complex (GO:0030964)                                     | PSII associated light-harvesting complex II, core complex (GO:0009655)                 |
| Nem1-Spo7 phosphatase complex (GO:0071595)                                  |                                                                                        |

Supplementary Table 1. Continued

|                                                        |                                                                                                 |                             |                                                                                         |
|--------------------------------------------------------|-------------------------------------------------------------------------------------------------|-----------------------------|-----------------------------------------------------------------------------------------|
|                                                        | PSII associated light-harvesting complex II, peripheral complex (GO:0009656)                    |                             | non-membrane-bounded organelle (GO:0043228)                                             |
|                                                        | PSII associated light-harvesting complex II, peripheral complex, LHCIIb subcomplex (GO:0030085) |                             | organelle part (GO:0044422)                                                             |
|                                                        | Ragulator complex (GO:0071986)                                                                  | organelle part (GO:0044422) | vesicle (GO:0031982)                                                                    |
|                                                        | respiratory chain (GO:0070469)                                                                  |                             | axoneme (GO:0005930)                                                                    |
|                                                        | respiratory chain complex II (GO:0045273)                                                       |                             | axoneme part (GO:0044447)                                                               |
|                                                        | respiratory chain complex III (GO:0045275)                                                      |                             | bacterial-type flagellum part (GO:0044461)                                              |
|                                                        | respiratory chain complex IV (GO:0045277)                                                       |                             | contractile fiber part (GO:0044449)                                                     |
|                                                        | retromer complex (GO:0030904)                                                                   |                             | Dsc E3 ubiquitin ligase complex (GO:0044695)                                            |
|                                                        | retromer complex, inner shell (GO:0030906)                                                      |                             | intracellular organelle part (GO:0044446)                                               |
|                                                        | retromer complex, outer shell (GO:0030905)                                                      |                             | kinocilium (GO:0060091)                                                                 |
|                                                        | Sec62/Sec63 complex (GO:0031207)                                                                |                             | organellar ribosome (GO:0000313)                                                        |
|                                                        | signal peptidase complex (GO:0005787)                                                           |                             | organelle lumen (GO:0043233)                                                            |
|                                                        | signal recognition particle receptor complex (GO:0005785)                                       |                             | organelle membrane (GO:0031090)                                                         |
|                                                        | SNARE complex (GO:0031201)                                                                      |                             | organelle membrane contact site (GO:0044232)                                            |
|                                                        | sodium ion-transporting two-sector ATPase complex (GO:0016472)                                  |                             | plasma membrane-derived photosystem I (GO:0030094)                                      |
|                                                        | SREBP-SCAP complex (GO:0032936)                                                                 |                             | plasma membrane-derived thylakoid membrane (GO:0031676)                                 |
|                                                        | SREBP-SCAP-Insig complex (GO:0032937)                                                           |                             | plasma membrane-derived thylakoid photosystem II (GO:0030096)                           |
|                                                        | starch utilization system complex (GO:0044570)                                                  |                             | plasma membrane-derived thylakoid ribulose biphosphate carboxylase complex (GO:0048493) |
|                                                        | succinate dehydrogenase complex (GO:0045281)                                                    |                             | stereocilium (GO:0032420)                                                               |
|                                                        | TAP complex (GO:0042825)                                                                        |                             | stereocilium membrane (GO:0060171)                                                      |
|                                                        | thylakoid light-harvesting complex (GO:0009503)                                                 |                             | symbiont-containing vacuolar membrane network (GO:0020006)                              |
|                                                        | Tic complex (GO:0031897)                                                                        |                             | symbiont-containing vacuolar space (GO:0020004)                                         |
|                                                        | Toc complex (GO:0010006)                                                                        |                             | symbiont-containing vacuole membrane (GO:0020005)                                       |
|                                                        | translocon complex (GO:0071256)                                                                 | symplast (GO:0055044)       | TRAPPI protein complex (GO:1990070)                                                     |
|                                                        | UDP-N-acetylglucosamine transferase complex (GO:0043541)                                        | synapse (GO:0045202)        | plasmodesma (GO:0009506)                                                                |
|                                                        | Vps55/Vps68 complex (GO:0034424)                                                                |                             | asymmetric synapse (GO:0032279)                                                         |
| membrane-enclosed lumen (GO:0031974)                   | organelle envelope lumen (GO:0031970)                                                           |                             | excitatory synapse (GO:0060076)                                                         |
|                                                        | organelle lumen (GO:0043233)                                                                    |                             | inhibitory synapse (GO:0060077)                                                         |
| mitochondrion-associated adherens complex (GO:0097423) | mitochondrion-associated adherens complex                                                       |                             | mossy fiber rosette (GO:0097471)                                                        |
| nucleoid (GO:0009295)                                  | bacterial nucleoid (GO:0043590)                                                                 |                             | neuromuscular junction (GO:0031594)                                                     |
|                                                        | mitochondrial nucleoid (GO:0042645)                                                             |                             | ribbon synapse (GO:0097470)                                                             |
|                                                        | plastid nucleoid (GO:0042646)                                                                   |                             | symmetric synapse (GO:0032280)                                                          |
|                                                        | single-stranded DNA-binding protein complex (GO:0044777)                                        | synapse part (GO:0044456)   | synapse part (GO:0044456)                                                               |
|                                                        | virion nucleoid (GO:0039642)                                                                    |                             | clathrin coat of synaptic vesicle (GO:0030129)                                          |
| organelle (GO:0043226)                                 | extracellular organelle (GO:0043230)                                                            |                             | integral to synaptic vesicle membrane (GO:0030285)                                      |
|                                                        | intracellular organelle (GO:0043229)                                                            |                             | postsynaptic density (GO:0014069)                                                       |
|                                                        | membrane-bounded organelle (GO:0043227)                                                         |                             | presynaptic active zone (GO:0048786)                                                    |
|                                                        |                                                                                                 |                             | presynaptic active zone dense projection (GO:0097445)                                   |
|                                                        |                                                                                                 |                             | presynaptic cytoskeletal matrix assembled at active zones (GO:0048788)                  |
|                                                        |                                                                                                 |                             | presynaptic grid (GO:1990013)                                                           |

Supplementary Table 1. Continued

|                                 |                                                                           |                                                            |                                                                       |
|---------------------------------|---------------------------------------------------------------------------|------------------------------------------------------------|-----------------------------------------------------------------------|
|                                 | presynaptic periaxonal zone (GO:0036062)                                  |                                                            |                                                                       |
|                                 | subsynaptic reticulum (GO:0071212)                                        |                                                            |                                                                       |
|                                 | synaptic cleft (GO:0043083)                                               |                                                            |                                                                       |
|                                 | synaptic membrane (GO:0097060)                                            |                                                            |                                                                       |
|                                 | synaptic vesicle (GO:0008021)                                             |                                                            |                                                                       |
|                                 | synaptic vesicle lumen (GO:0034592)                                       |                                                            |                                                                       |
|                                 | synaptic vesicle membrane (GO:0030672)                                    |                                                            |                                                                       |
|                                 | terminal bouton (GO:0043195)                                              |                                                            |                                                                       |
| virion (GO:0019012)             | virion part (GO:0044423)                                                  |                                                            |                                                                       |
| virion part (GO:0044423)        | capsomere (GO:0046727)                                                    |                                                            |                                                                       |
|                                 | icosahedral viral capsid, collar (GO:0098031)                             |                                                            |                                                                       |
|                                 | icosahedral viral capsid, collar fiber (GO:0098032)                       |                                                            |                                                                       |
|                                 | icosahedral viral capsid, neck (GO:0098030)                               |                                                            |                                                                       |
|                                 | icosahedral viral capsid, neck fiber (GO:0098033)                         |                                                            |                                                                       |
|                                 | icosahedral viral capsid, spike (GO:0098029)                              |                                                            |                                                                       |
|                                 | viral capsid (GO:0019028)                                                 |                                                            |                                                                       |
|                                 | viral capsid, decoration (GO:0098021)                                     |                                                            |                                                                       |
|                                 | viral capsid, internal space (GO:0098061)                                 |                                                            |                                                                       |
|                                 | viral genome (GO:0019015)                                                 |                                                            |                                                                       |
|                                 | viral inner capsid (GO:0039625)                                           |                                                            |                                                                       |
|                                 | viral intermediate capsid (GO:0039626)                                    |                                                            |                                                                       |
|                                 | viral membrane (GO:0036338)                                               |                                                            |                                                                       |
|                                 | viral nucleocapsid (GO:0019013)                                           |                                                            |                                                                       |
|                                 | viral outer capsid (GO:0039624)                                           |                                                            |                                                                       |
|                                 | viral portal complex (GO:0046798)                                         |                                                            |                                                                       |
|                                 | viral procapsid (GO:0046729)                                              |                                                            |                                                                       |
|                                 | viral scaffold (GO:0046806)                                               |                                                            |                                                                       |
|                                 | viral tegument (GO:0019033)                                               |                                                            |                                                                       |
|                                 | viral terminase complex (GO:0043493)                                      |                                                            |                                                                       |
|                                 | virion membrane (GO:0055036)                                              |                                                            |                                                                       |
|                                 | virion nucleoid (GO:0039642)                                              |                                                            |                                                                       |
|                                 | virus tail (GO:0098015)                                                   |                                                            |                                                                       |
|                                 | virus tail, baseplate (GO:0098025)                                        |                                                            |                                                                       |
|                                 | virus tail, fiber (GO:0098024)                                            |                                                            |                                                                       |
|                                 | virus tail, major subunit (GO:0098019)                                    |                                                            |                                                                       |
|                                 | virus tail, minor subunit (GO:0098020)                                    |                                                            |                                                                       |
|                                 | virus tail, shaft (GO:0098028)                                            |                                                            |                                                                       |
|                                 | virus tail, sheath (GO:0098027)                                           |                                                            |                                                                       |
|                                 | virus tail, tip (GO:0098023)                                              |                                                            |                                                                       |
|                                 | virus tail, tube (GO:0098026)                                             |                                                            |                                                                       |
|                                 | virus terminase, large subunit (GO:0098009)                               |                                                            |                                                                       |
| Biological process (GO:0022610) | adhesion to other organism involved in symbiotic interaction (GO:0051825) |                                                            |                                                                       |
|                                 | cell adhesion (GO:0007155)                                                |                                                            |                                                                       |
|                                 | multicellular organism adhesion (GO:0022608)                              |                                                            |                                                                       |
|                                 |                                                                           | biological regulation (GO:0065007)                         | regulation of biological process (GO:0050789)                         |
|                                 |                                                                           |                                                            | regulation of biological quality (GO:0065008)                         |
|                                 |                                                                           |                                                            | regulation of molecular function (GO:0065009)                         |
|                                 |                                                                           | cell killing (GO:0001906)                                  | complement-dependent cytotoxicity (GO:0097278)                        |
|                                 |                                                                           |                                                            | killing of cells of other organism (GO:0031640)                       |
|                                 |                                                                           |                                                            | leukocyte mediated cytotoxicity (GO:0001909)                          |
|                                 |                                                                           |                                                            | negative regulation of cell killing (GO:0031342)                      |
|                                 |                                                                           |                                                            | positive regulation of cell killing (GO:0031343)                      |
|                                 |                                                                           |                                                            | regulation of cell killing (GO:0031341)                               |
|                                 |                                                                           | cellular component organization or biogenesis (GO:0071840) | cell wall organization or biogenesis (GO:0071554)                     |
|                                 |                                                                           |                                                            | cellular component biogenesis (GO:0044085)                            |
|                                 |                                                                           |                                                            | cellular component organization (GO:0016043)                          |
|                                 |                                                                           | cellular process (GO:0009987)                              | cellular metabolic process (GO:0044237)                               |
|                                 |                                                                           |                                                            | cellular process involved in reproduction (GO:0048610)                |
|                                 |                                                                           |                                                            | multi-organism cellular process (GO:0044764)                          |
|                                 |                                                                           |                                                            | negative regulation of cellular process (GO:0048523)                  |
|                                 |                                                                           |                                                            | phenotypic switching (GO:0036166)                                     |
|                                 |                                                                           |                                                            | positive regulation of cellular process (GO:0048522)                  |
|                                 |                                                                           |                                                            | regulation of cellular process (GO:0050794)                           |
|                                 |                                                                           |                                                            | single-organism cellular process (GO:0044763)                         |
|                                 |                                                                           | developmental process (GO:0032502)                         | abscission (GO:0009838)                                               |
|                                 |                                                                           |                                                            | age-dependent behavioral decline (GO:0035982)                         |
|                                 |                                                                           |                                                            | anatomical structure development (GO:0048856)                         |
|                                 |                                                                           |                                                            | anatomical structure formation involved in morphogenesis (GO:0048646) |
|                                 |                                                                           |                                                            | anatomical structure morphogenesis (GO:0009653)                       |
|                                 |                                                                           |                                                            | cellular developmental process (GO:0048869)                           |
|                                 |                                                                           |                                                            | development involved in symbiotic interaction (GO:0044111)            |
|                                 |                                                                           |                                                            | developmental pigmentation (GO:0048066)                               |
|                                 |                                                                           |                                                            | developmental process involved in reproduction (GO:0003006)           |
|                                 |                                                                           |                                                            | dormancy process (GO:0022611)                                         |
|                                 |                                                                           |                                                            | innervation (GO:0060384)                                              |
|                                 |                                                                           |                                                            | keratinization (GO:0031424)                                           |
|                                 |                                                                           |                                                            | megagametogenesis (GO:0009561)                                        |
|                                 |                                                                           |                                                            | meristem determinacy (GO:0010022)                                     |



Supplementary Table 1. Continued

|                                            |                                                                                     |  |                                    |                                                                                                              |
|--------------------------------------------|-------------------------------------------------------------------------------------|--|------------------------------------|--------------------------------------------------------------------------------------------------------------|
|                                            | meristem maintenance (GO:0010073)                                                   |  | immune system process (GO:0002376) | activation of immune response (GO:0002253)                                                                   |
|                                            | microgametogenesis (GO:0055046)                                                     |  |                                    | antigen processing and presentation (GO:0019882)                                                             |
|                                            | midbrain-hindbrain boundary maturation during brain development (GO:0022004)        |  |                                    | antigen sampling in mucosal-associated lymphoid tissue (GO:0002404)                                          |
|                                            | midbrain-hindbrain boundary maturation during neural plate development (GO:0022005) |  |                                    | B cell selection (GO:0002339)                                                                                |
|                                            | multicellular organismal development (GO:0007275)                                   |  |                                    | hemocyte differentiation (GO:0042386)                                                                        |
|                                            | muscle attachment (GO:0016203)                                                      |  |                                    | hemocyte proliferation (GO:0035172)                                                                          |
|                                            | negative regulation of developmental process (GO:0051093)                           |  |                                    | immune effector process (GO:0002252)                                                                         |
|                                            | organism emergence from protective structure (GO:0071684)                           |  |                                    | immune response (GO:0006955)                                                                                 |
|                                            | otolith tethering (GO:0035889)                                                      |  |                                    | immune system development (GO:0002520)                                                                       |
|                                            | pattern specification process (GO:0007389)                                          |  |                                    | leukocyte activation (GO:0045321)                                                                            |
|                                            | polyphenic determination (GO:0048647)                                               |  |                                    | leukocyte homeostasis (GO:0001776)                                                                           |
|                                            | positive regulation of developmental process (GO:0051094)                           |  |                                    | leukocyte migration (GO:0050900)                                                                             |
|                                            | post-embryonic development (GO:0009791)                                             |  |                                    | lymphocyte costimulation (GO:0031294)                                                                        |
|                                            | pseudocleavage (GO:0030588)                                                         |  |                                    | myeloid cell homeostasis (GO:0002262)                                                                        |
|                                            | pupariation (GO:0035073)                                                            |  |                                    | negative regulation of immune system process (GO:0002683)                                                    |
|                                            | pupation (GO:0035074)                                                               |  |                                    | positive regulation of immune system process (GO:0002684)                                                    |
|                                            | regulation of developmental process (GO:0050793)                                    |  |                                    | production of molecular mediator of immune response (GO:0002440)                                             |
|                                            | single-organism developmental process (GO:0044767)                                  |  |                                    | regulation of immune system process (GO:0002682)                                                             |
|                                            | spore germination (GO:0009847)                                                      |  |                                    | somatic diversification of immune receptors (GO:0002200)                                                     |
|                                            | stem cell maintenance (GO:0019827)                                                  |  |                                    | T cell selection (GO:0045058)                                                                                |
| establishment of localization (GO:0051234) | establishment of localization in cell (GO:0051649)                                  |  | localization (GO:0051179)          | tolerance induction (GO:0002507)                                                                             |
|                                            | establishment of organelle localization (GO:0051656)                                |  |                                    | cellular localization (GO:0051641)                                                                           |
|                                            | establishment of protein localization (GO:0045184)                                  |  |                                    | establishment of localization (GO:0051234)                                                                   |
|                                            | establishment of RNA localization (GO:0051236)                                      |  |                                    | localization of cell (GO:0051674)                                                                            |
|                                            | transport (GO:0006810)                                                              |  |                                    | macromolecule localization (GO:0033036)                                                                      |
| growth (GO:0040007)                        | budding cell bud growth (GO:0007117)                                                |  |                                    | maintenance of location (GO:0051235)                                                                         |
|                                            | cardiac muscle tissue growth (GO:0055017)                                           |  |                                    | nitric oxide storage (GO:0035732)                                                                            |
|                                            | cell growth (GO:0016049)                                                            |  |                                    | regulation of localization (GO:0032879)                                                                      |
|                                            | developmental growth (GO:0048589)                                                   |  | locomotion (GO:0040011)            | cell motility (GO:0048870)                                                                                   |
|                                            | filamentous growth (GO:0030447)                                                     |  |                                    | directional locomotion (GO:0033058)                                                                          |
|                                            | growth involved in symbiotic interaction (GO:0044110)                               |  |                                    | dissemination or transmission of organism from other organism involved in symbiotic interaction (GO:0051821) |
|                                            | lateral growth (GO:0080190)                                                         |  |                                    | flight (GO:0060361)                                                                                          |
|                                            | multicellular organism growth (GO:0035264)                                          |  |                                    | locomotion involved in locomotory behavior (GO:0031987)                                                      |
|                                            | negative regulation of growth (GO:0045926)                                          |  |                                    | movement in environment of other organism involved in symbiotic interaction (GO:0052192)                     |
|                                            | organ growth (GO:0035265)                                                           |  |                                    | negative regulation of locomotion (GO:0040013)                                                               |
|                                            | positive regulation of growth (GO:0045927)                                          |  |                                    | positive regulation of locomotion (GO:0040017)                                                               |
|                                            | primary growth (GO:0080189)                                                         |  |                                    | regulation of locomotion (GO:0040012)                                                                        |
|                                            | regulation of growth (GO:0040008)                                                   |  |                                    | swimming (GO:0036268)                                                                                        |
|                                            |                                                                                     |  |                                    | taxis (GO:0042330)                                                                                           |
|                                            |                                                                                     |  | metabolic process (GO:0008152)     | biosynthetic process (GO:0009058)                                                                            |
|                                            |                                                                                     |  |                                    | catabolic process (GO:0009056)                                                                               |

Supplementary Table 1. Continued

|                                               |                                                                           |  |                                                                                         |
|-----------------------------------------------|---------------------------------------------------------------------------|--|-----------------------------------------------------------------------------------------|
|                                               | cellular metabolic process (GO:0044237)                                   |  | negative regulation of border follicle cell delamination (GO:0030712)                   |
|                                               | hormone metabolic process (GO:0042445)                                    |  | negative regulation of cell cycle checkpoint (GO:1901977)                               |
|                                               | methylation (GO:0032259)                                                  |  | negative regulation of cell killing (GO:0031342)                                        |
|                                               | multi-organism metabolic process (GO:0044033)                             |  | negative regulation of cellular component organization (GO:0051129)                     |
|                                               | negative regulation of metabolic process (GO:0009892)                     |  | negative regulation of cellular process (GO:0048523)                                    |
|                                               | nitrogen compound metabolic process (GO:0006807)                          |  | negative regulation of circadian rhythm (GO:0042754)                                    |
|                                               | organic substance metabolic process (GO:0071704)                          |  | negative regulation of defecation rhythm (GO:2000747)                                   |
|                                               | positive regulation of metabolic process (GO:0009893)                     |  | negative regulation of developmental process (GO:0051093)                               |
|                                               | primary metabolic process (GO:0044238)                                    |  | negative regulation of dosage compensation by inactivation of X chromosome (GO:1900096) |
|                                               | regulation of metabolic process (GO:0019222)                              |  | negative regulation of fibrinolysis (GO:0051918)                                        |
|                                               | single-organism metabolic process (GO:0044710)                            |  | negative regulation of growth (GO:0045926)                                              |
|                                               | tyrocidine metabolic process (GO:1901902)                                 |  | negative regulation of homeostatic process (GO:0032845)                                 |
|                                               | wax metabolic process (GO:0010166)                                        |  | negative regulation of immune system process (GO:0002683)                               |
| multi-organism process (GO:0051704)           | adhesion to other organism involved in symbiotic interaction (GO:0051825) |  | negative regulation of lipid storage (GO:0010888)                                       |
|                                               | development involved in symbiotic interaction (GO:0044111)                |  | negative regulation of locomotion (GO:0040013)                                          |
|                                               | growth involved in symbiotic interaction (GO:0044110)                     |  | negative regulation of long term synaptic depression (GO:1900453)                       |
|                                               | interspecies interaction between organisms (GO:0044419)                   |  | negative regulation of long-term synaptic potentiation (GO:1900272)                     |
|                                               | intraspecies interaction between organisms (GO:0051703)                   |  | negative regulation of metabolic process (GO:0009892)                                   |
|                                               | mating (GO:0007618)                                                       |  | negative regulation of multi-organism process (GO:0043901)                              |
|                                               | modification of morphology or physiology of other organism (GO:0035821)   |  | negative regulation of multicellular organismal process (GO:0051241)                    |
|                                               | multi-multicellular organism process (GO:0044706)                         |  | negative regulation of nitrogen utilization (GO:0045847)                                |
|                                               | multi-organism behavior (GO:0051705)                                      |  | negative regulation of ovarian follicle development (GO:2000355)                        |
|                                               | multi-organism cellular process (GO:0044764)                              |  | negative regulation of phosphorus utilization (GO:0045942)                              |
|                                               | multi-organism metabolic process (GO:0044033)                             |  | negative regulation of Ran GTPase activity (GO:1902264)                                 |
|                                               | multi-organism signaling (GO:0035636)                                     |  | negative regulation of reproductive process (GO:2000242)                                |
|                                               | multi-organism transport (GO:0044766)                                     |  | negative regulation of response to stimulus (GO:0048585)                                |
|                                               | negative regulation of multi-organism process (GO:0043901)                |  | negative regulation of sequestering of calcium ion (GO:0051283)                         |
|                                               | pathogenesis (GO:0009405)                                                 |  | negative regulation of sequestering of zinc ion (GO:0061089)                            |
|                                               | positive regulation of multi-organism process (GO:0043902)                |  | negative regulation of signaling (GO:0023057)                                           |
|                                               | regulation of multi-organism process (GO:0043900)                         |  |                                                                                         |
|                                               | response to other organism (GO:0051707)                                   |  |                                                                                         |
| multicellular organismal process (GO:0032501) | multi-multicellular organism process (GO:0044706)                         |  |                                                                                         |
|                                               | multicellular organism reproduction (GO:0032504)                          |  |                                                                                         |
|                                               | single-multicellular organism process (GO:0044707)                        |  |                                                                                         |

Supplementary Table 1. Continued

|                                                        |                                                                                         |                                               |                                                                                |
|--------------------------------------------------------|-----------------------------------------------------------------------------------------|-----------------------------------------------|--------------------------------------------------------------------------------|
|                                                        | negative regulation of sulfur utilization (GO:0045882)                                  |                                               | positive regulation of response to stimulus (GO:0048584)                       |
|                                                        | negative regulation of transport (GO:0051051)                                           |                                               | positive regulation of sequestering of calcium ion (GO:0051284)                |
|                                                        | negative regulation of viral protein levels in host cell (GO:0046725)                   |                                               | positive regulation of sequestering of zinc ion (GO:0061090)                   |
| positive regulation of biological process (GO:0048518) | positive regulation of border follicle cell delamination (GO:0030711)                   |                                               | positive regulation of signaling (GO:0023056)                                  |
|                                                        | positive regulation of cell cycle checkpoint (GO:1901978)                               |                                               | positive regulation of sulfur utilization (GO:0045883)                         |
|                                                        | positive regulation of cell killing (GO:0031343)                                        |                                               | positive regulation of transport (GO:0051050)                                  |
|                                                        | positive regulation of cellular component biogenesis (GO:0044089)                       |                                               | positive regulation of viral protein levels in host cell (GO:0046726)          |
|                                                        | positive regulation of cellular component organization (GO:0051130)                     | regulation of biological process (GO:0050789) | negative regulation of biological process (GO:0048519)                         |
|                                                        | positive regulation of cellular process (GO:0048522)                                    |                                               | positive regulation of biological process (GO:0048518)                         |
|                                                        | positive regulation of circadian rhythm (GO:0042753)                                    |                                               | regulation of carbohydrate utilization (GO:0043610)                            |
|                                                        | positive regulation of defecation rhythm (GO:2000748)                                   |                                               | regulation of carbon utilization (GO:0043609)                                  |
|                                                        | positive regulation of developmental process (GO:0051094)                               |                                               | regulation of cell killing (GO:0031341)                                        |
|                                                        | positive regulation of dosage compensation by inactivation of X chromosome (GO:1900097) |                                               | regulation of cellular component biogenesis (GO:0044087)                       |
|                                                        | positive regulation of fibrinolysis (GO:0051919)                                        |                                               | regulation of cellular component organization (GO:0051128)                     |
|                                                        | positive regulation of growth (GO:0045927)                                              |                                               | regulation of cellular process (GO:0050794)                                    |
|                                                        | positive regulation of homeostatic process (GO:0032846)                                 |                                               | regulation of circadian rhythm (GO:0042752)                                    |
|                                                        | positive regulation of immune system process (GO:0002684)                               |                                               | regulation of developmental process (GO:0050793)                               |
|                                                        | positive regulation of induction of conjugation with cellular fusion (GO:1900237)       |                                               | regulation of dosage compensation by inactivation of X chromosome (GO:1900095) |
|                                                        | positive regulation of lipid storage (GO:0010884)                                       |                                               | regulation of estrogen receptor binding (GO:0071898)                           |
|                                                        | positive regulation of locomotion (GO:0040017)                                          |                                               | regulation of fibrinolysis (GO:0051917)                                        |
|                                                        | positive regulation of long term synaptic depression (GO:1900454)                       |                                               | regulation of growth (GO:0040008)                                              |
|                                                        | positive regulation of long-term synaptic potentiation (GO:1900273)                     |                                               | regulation of homeostatic process (GO:0032844)                                 |
|                                                        | positive regulation of metabolic process (GO:0009893)                                   |                                               | regulation of immune system process (GO:0002682)                               |
|                                                        | positive regulation of multi-organism process (GO:0043902)                              |                                               | regulation of localization (GO:0032879)                                        |
|                                                        | positive regulation of multicellular organismal process (GO:0051240)                    |                                               | regulation of locomotion (GO:0040012)                                          |
|                                                        | positive regulation of nitrogen utilization (GO:0045848)                                |                                               | regulation of long term synaptic depression (GO:1900452)                       |
|                                                        | positive regulation of ovarian follicle development (GO:2000386)                        |                                               | regulation of long-term synaptic potentiation (GO:1900271)                     |
|                                                        | positive regulation of phosphorus utilization (GO:0045949)                              |                                               | regulation of metabolic process (GO:0019222)                                   |
|                                                        | positive regulation of reproductive process (GO:2000243)                                |                                               | regulation of multi-organism process (GO:0043900)                              |
|                                                        |                                                                                         |                                               | regulation of multicellular organismal process (GO:0051239)                    |
|                                                        |                                                                                         |                                               | regulation of nitrogen utilization (GO:0006808)                                |
|                                                        |                                                                                         |                                               | regulation of phosphorus utilization (GO:0006795)                              |

Supplementary Table 1. Continued

|                                   |                                                                           |                                      |                                                                               |
|-----------------------------------|---------------------------------------------------------------------------|--------------------------------------|-------------------------------------------------------------------------------|
|                                   | regulation of plasma lipoprotein particle levels (GO:0097006)             |                                      | response to dietary excess (GO:0002021)                                       |
|                                   | regulation of reproductive process (GO:2000241)                           |                                      | response to endogenous stimulus (GO:0009719)                                  |
|                                   | regulation of response to stimulus (GO:0048583)                           |                                      | response to external stimulus (GO:0009605)                                    |
|                                   | regulation of Rho guanyl-nucleotide exchange factor activity (GO:2001106) |                                      | response to inactivity (GO:0014854)                                           |
|                                   | regulation of signaling (GO:0023051)                                      |                                      | response to redox state (GO:0051775)                                          |
|                                   | regulation of sulfur utilization (GO:0006792)                             |                                      | response to stimulus involved in regulation of muscle adaptation (GO:0014874) |
| reproduction (GO:0000003)         | asexual reproduction (GO:0019954)                                         | rhythmic process (GO:0048511)        | response to stress (GO:0006950)                                               |
|                                   | cellular process involved in reproduction (GO:0048610)                    |                                      | circadian rhythm (GO:0007623)                                                 |
|                                   | multicellular organism reproduction (GO:0032504)                          |                                      | ovulation cycle (GO:0042698)                                                  |
|                                   | reproduction of a single-celled organism (GO:0032505)                     |                                      | ovulation cycle process (GO:0022602)                                          |
|                                   | reproductive process (GO:0022414)                                         | signaling (GO:0023052)               | rhythmic behavior (GO:0007622)                                                |
|                                   | sexual reproduction (GO:0019953)                                          | single-organism process (GO:0044699) | ultradian rhythm (GO:0007624)                                                 |
| reproductive process (GO:0022414) | developmental process involved in reproduction (GO:0003006)               |                                      | multi-organism signaling (GO:0035636)                                         |
|                                   | multi-organism reproductive process (GO:0044703)                          |                                      | single organism signaling (GO:0044700)                                        |
|                                   | multicellular organismal reproductive process (GO:0048609)                |                                      | antibody-dependent cellular cytotoxicity (GO:0001788)                         |
|                                   | negative regulation of reproductive process (GO:2000242)                  |                                      | carbohydrate utilization (GO:0009758)                                         |
|                                   | positive regulation of reproductive process (GO:2000243)                  |                                      | carbon utilization (GO:0015976)                                               |
|                                   | regulation of reproductive process (GO:2000241)                           |                                      | cell proliferation (GO:0008283)                                               |
|                                   | reproductive behavior (GO:0019098)                                        |                                      | complement-dependent cytotoxicity (GO:0097278)                                |
|                                   | single organism reproductive process (GO:0044702)                         |                                      | death (GO:0016265)                                                            |
| response to stimulus (GO:0050896) | behavior (GO:0007610)                                                     |                                      | eclosion rhythm (GO:0008062)                                                  |
|                                   | cellular response to stimulus (GO:0051716)                                |                                      | establishment of pole plasm mRNA localization (GO:0046595)                    |
|                                   | detection of stimulus (GO:0051606)                                        |                                      | establishment of protein localization to extracellular region (GO:0035592)    |
|                                   | immune response (GO:0006955)                                              |                                      | filamentous growth (GO:0030447)                                               |
|                                   | muscle adaptation (GO:0043500)                                            |                                      | lateral growth (GO:0080190)                                                   |
|                                   | negative regulation of response to stimulus (GO:0048585)                  |                                      | locomotor rhythm (GO:0045475)                                                 |
|                                   | positive regulation of response to stimulus (GO:0048584)                  |                                      | natural killer cell mediated cytotoxicity (GO:0042267)                        |
|                                   | protein activation cascade (GO:0072376)                                   |                                      | nitrogen utilization (GO:0019740)                                             |
|                                   | regulation of response to stimulus (GO:0048583)                           |                                      | ovulation cycle process (GO:0022602)                                          |
|                                   | response to abiotic stimulus (GO:0009628)                                 |                                      | phosphorus utilization (GO:0006794)                                           |
|                                   | response to activity (GO:0014823)                                         |                                      | pigmentation (GO:0043473)                                                     |
|                                   | response to biotic stimulus (GO:0009607)                                  |                                      | protein activation cascade (GO:0072376)                                       |
|                                   | response to chemical stimulus (GO:0042221)                                |                                      | single organism reproductive process (GO:0044702)                             |
|                                   |                                                                           |                                      | single organism signaling (GO:0044700)                                        |
|                                   |                                                                           |                                      | single-multicellular organism process (GO:0044707)                            |
|                                   |                                                                           |                                      | single-organism cellular process (GO:0044763)                                 |
|                                   |                                                                           |                                      | single-organism developmental process (GO:0044767)                            |
|                                   |                                                                           |                                      | single-organism transport (GO:0044765)                                        |
|                                   |                                                                           |                                      | sulfur utilization (GO:0006791)                                               |
|                                   |                                                                           |                                      | T cell mediated cytotoxicity (GO:0001913)                                     |
|                                   |                                                                           |                                      | ultradian rhythm (GO:0007624)                                                 |
